# Supplementary material for: Synthesis of porous Mn2O3 embedded in reduced graphene oxide as advanced anode materials for lithium storage
Source: Royal Society of Chemistry journal article supplement (doi:10.1039/c7nj01066d), 2017-01-01
Supplement: c7nj01066d1.pdf [file c7nj01066d1.pdf]

## Supporting Information

### Synthesis of Porous $\text{Mn}_2\text{O}_3$ Embedded in Reduced Graphene Oxide as Advanced Anode Materials for Lithium Storage

Lingling Zhang,<sup>a</sup> Danhua Ge,<sup>a</sup> Hongbo Geng,<sup>a</sup> Junwei Zheng,<sup>b</sup> Xueqin Cao,<sup>\*a</sup> and Hongwei Gu<sup>\*a</sup>

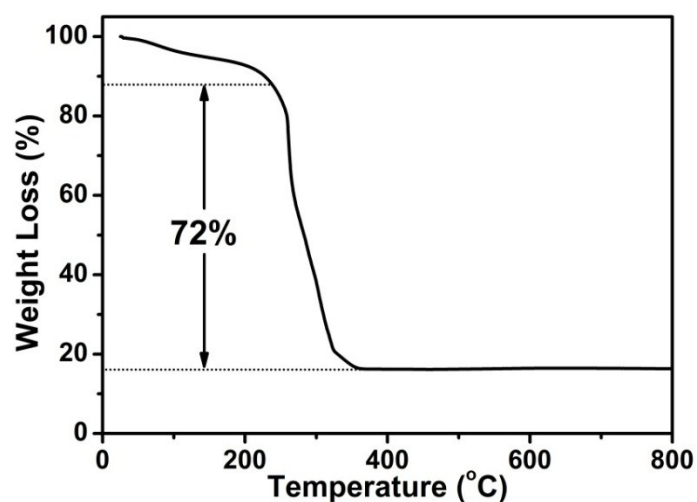

**Figure S1.** TGA plot of self-assembly aggregation precursor  $\text{Mn}(\text{OAc})_2\text{-C-8}$ .

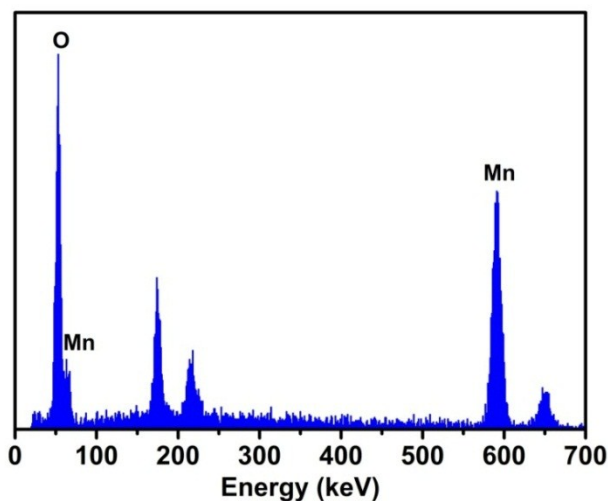

**Figure S2.** Energy-dispersive X-ray spectroscopy (EDS) plot of pure  $\text{Mn}_2\text{O}_3$  nanospheres.

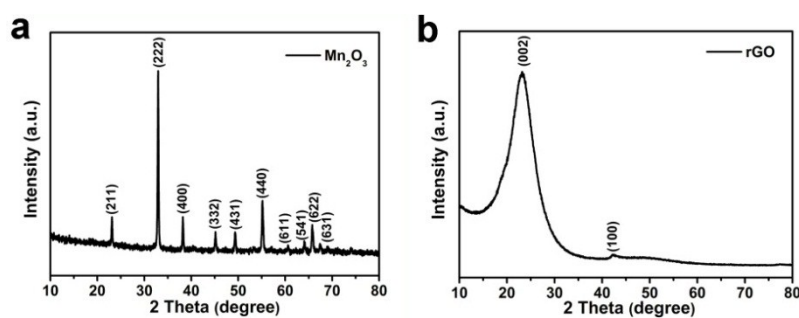

**Figure S3.** XRD patterns of pure  $\text{Mn}_2\text{O}_3$  nanospheres and rGO.

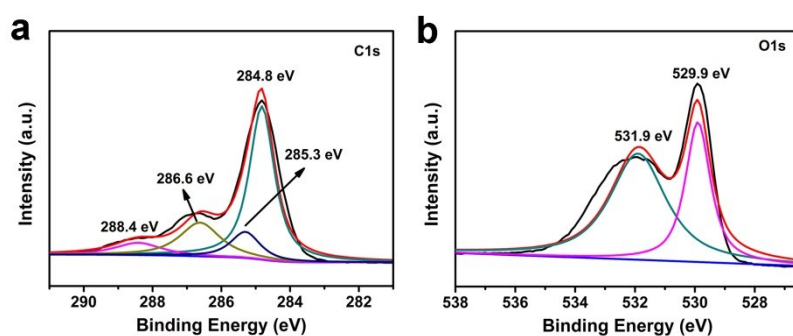

**Figure S4.** XPS spectra for as-prepared  $\text{Mn}_2\text{O}_3$ @rGO composites: the high resolution spectra for (a)  $\text{C}1\text{s}$ , (b)  $\text{O}1\text{s}$ .

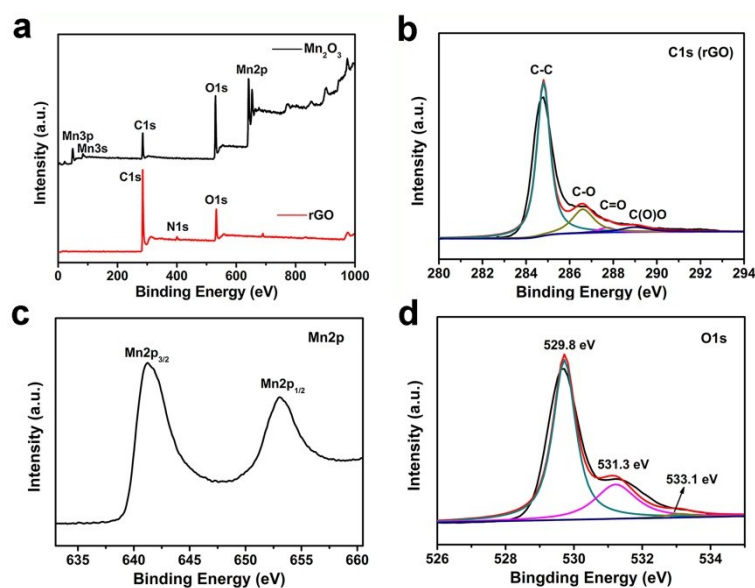

**Figure S5.** XPS spectra for pure  $\text{Mn}_2\text{O}_3$  and rGO: (a) the survey spectrum and the high resolution spectra for (b)  $\text{C}1\text{s}$  of rGO, (c)  $\text{Mn}2\text{p}$  and (d)  $\text{O}1\text{s}$ .

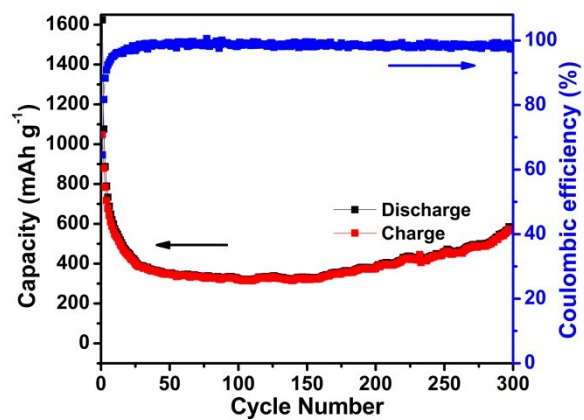

**Figure S6.** Cycling performance and coulombic efficiency of pure  $\text{Mn}_2\text{O}_3$  nanospheres at a current density of  $0.1 \text{ A g}^{-1}$ .
